# Supplementary material
Source: PubMed Central journal article supplement (PMC4931981)
Supplement: NIHMS777713-supplement-Supp_Info.pdf [file NIHMS777713-supplement-Supp_Info.pdf]

# Supplemental Figure 1

**A**

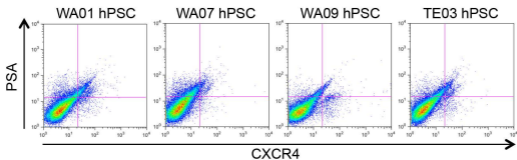

**B**

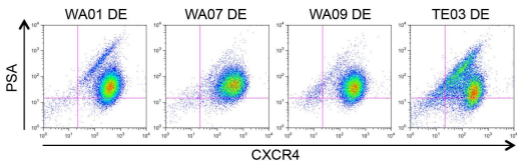

**C**

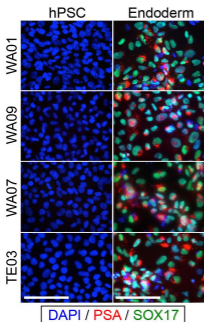

**D**

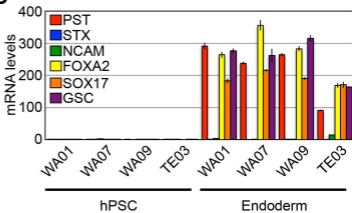

**E**

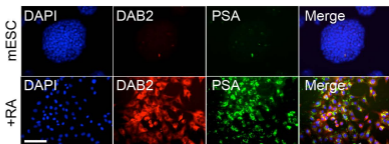

## Supplemental Figure 2

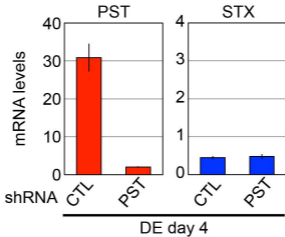

# Supplemental Figure 3

## A

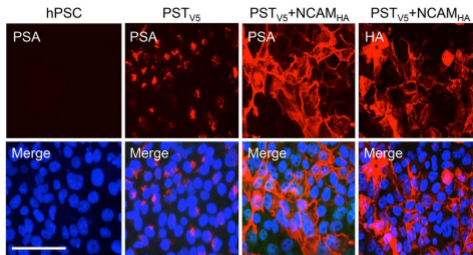

## B

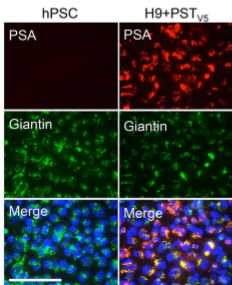

## C

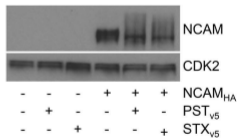

## Supplemental Figure 4

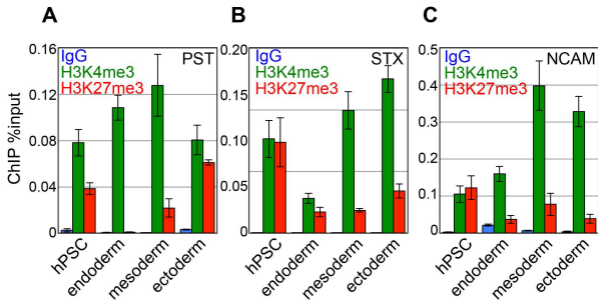

# Supplemental Figure 5

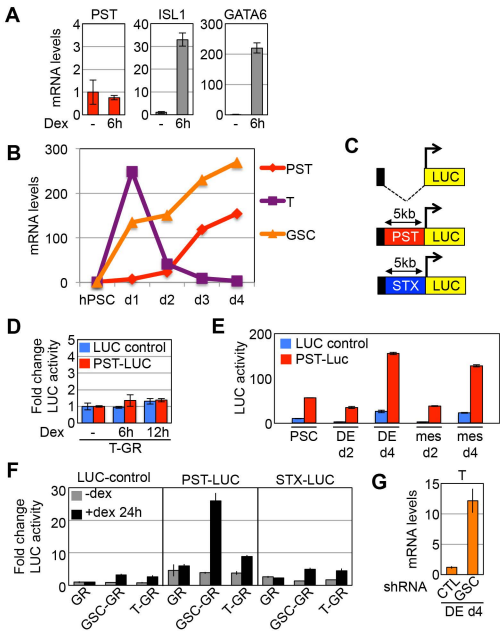

# Supplemental Figure 6

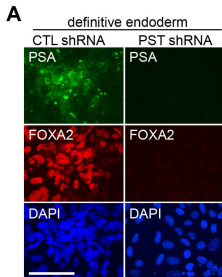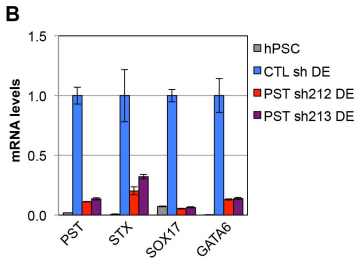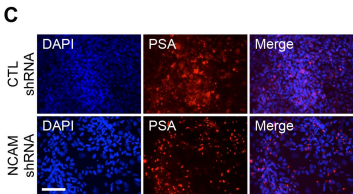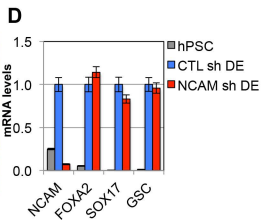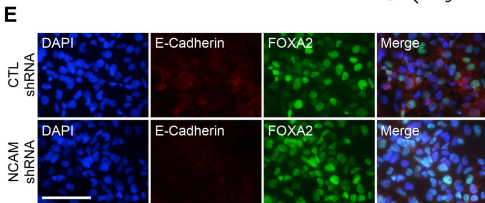

# Supplemental Figure 7

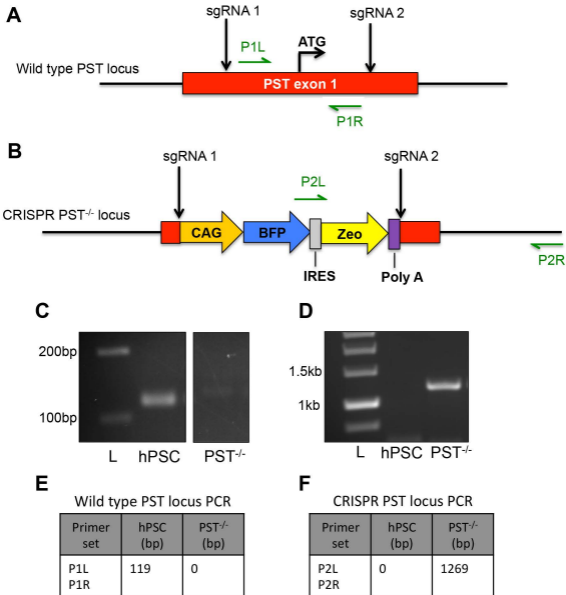

## Supplemental Figure 8

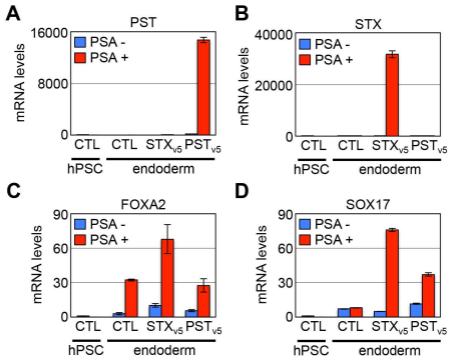



# Supplemental Figure 9

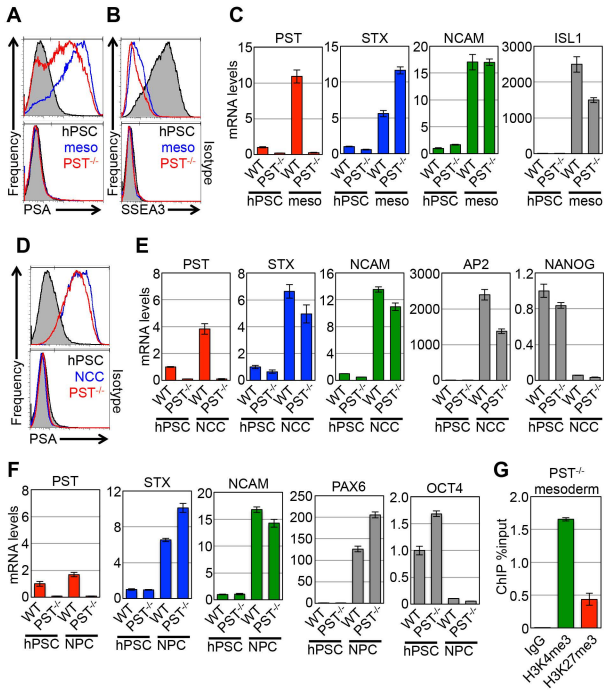

# Supplemental Figure 10

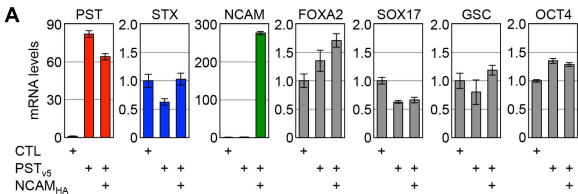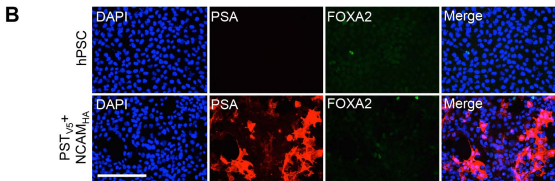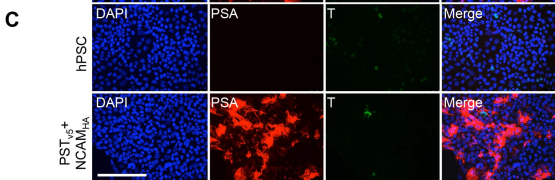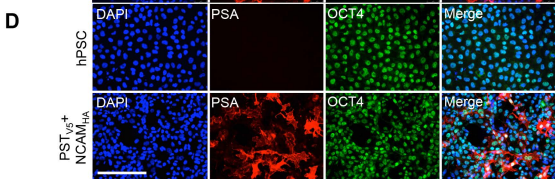

Table S1 – Antibody information

| Antibody                 | Source      | Catalog no. | Uses*       | Dilution (IB) | Dilution (FC) | Dilution (IHC) |
|--------------------------|-------------|-------------|-------------|---------------|---------------|----------------|
| PSA                      |             | mAb 735     | IB, IHC, FC | 1:1000        | 1:100         | 1:250          |
| SOX17                    | R&D Systems | AF1924      | IB, IHC     | 1:1000        | -             | 1:100          |
| T                        | R&D Systems | AF2085      | IHC         | -             | -             | 1:100          |
| NANOG                    | Genetex     | GTX100863   | IHC         | -             | -             | 1:100          |
| Giantin                  | abcam       | ab24586     | IHC         | -             | -             | 1:100          |
| $\alpha$ -Mannosidase II | abcam       | ab12277     | IHC         | -             | -             | 1:100          |
| CDK2                     | Santa Cruz  | SC-163      | IB          | 1:2000        | -             | -              |
| NCAM                     | Santa Cruz  | 123A8       | IB, IHC, FC | 1:500         | 1:50          | 1:50           |
| SNAI1                    | R&D Systems | AF3639      | IHC         | -             | -             | 1:100          |
| FOXA2                    | Millipore   | 07-633      | IB, IHC     | 1:1000        | -             | 1:100          |
| CXCR4                    | eBioscience | 17-9999     | FC          | -             | 1X            | -              |
| SSEA3                    | eBioscience | 53-8833     | FC          | -             | 1X            | -              |
| V5                       | Invitrogen  | 46-0705     | IHC         | -             | -             | 1:100          |
| HA                       | Sigma       | H3663-200UL | IHC         | -             | -             | 1:100          |
| GSC                      | R&D Systems | AF4086      | ChIP        | -             | -             | -              |
| H3K4me3                  | Abcam       | Ab8580      | ChIP        | -             | -             | -              |
| H3K27me3                 | Abcam       | Ab6002      | ChIP        | -             | -             | -              |
| IgG                      | Abcam       | Ab46540     | ChIP        | -             | -             | -              |
| E-Cadherin               | R&D Systems | AF648       | IHC         | -             | -             | 1:100          |

\*Uses key: IB – Immunoblot, IHC – Immunohistochemistry, FC – Flow cytometry, ChIP – chromatin immunoprecipitation
